CORRECTION

# Correction: No Evidence of Association between Childhood Urban Environment and Cortical Thinning in Psychotic Disorder

The *PLOS ONE* Staff

## Notice of Republication

This article was republished on February 14, 2017, to correct an error in the author list. The publisher apologizes for the error. Please download the article again to view the correct version. The originally published, uncorrected article and the republished, corrected articles are provided here for reference.

## Supporting information

**S1 File. Originally published, uncorrected article.**

(PDF)

**S2 File. Republished, corrected article.**

(PDF)

## Reference

1. Frissen A, van Os J, Habets P, Gronenschild E, Marcelis M, Genetic Risk and Outcome in Psychosis (G.R.O.U.P.) (2017) No Evidence of Association between Childhood Urban Environment and Cortical Thinning in Psychotic Disorder. *PLoS ONE* 12(1): e0166651. <https://doi.org/10.1371/journal.pone.0166651> PMID: 28045900

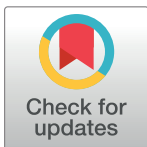

## OPEN ACCESS

**Citation:** The *PLOS ONE* Staff (2017) Correction: No Evidence of Association between Childhood Urban Environment and Cortical Thinning in Psychotic Disorder. *PLoS ONE* 12(5): e0178312. <https://doi.org/10.1371/journal.pone.0178312>

**Published:** May 18, 2017

**Copyright:** © 2017 The PLOS ONE Staff. This is an open access article distributed under the terms of the [Creative Commons Attribution License](https://creativecommons.org/licenses/by/4.0/), which permits unrestricted use, distribution, and reproduction in any medium, provided the original author and source are credited.
